# Emergence of Young Human Genes after a Burst of Retroposition in Primates

Ana Claudia Marques<sup>1</sup>, Isabelle Dupanloup<sup>1</sup>, Nicolas Vinckenbosch<sup>1</sup>, Alexandre Reymond<sup>1,2</sup>, Henrik Kaessmann<sup>1\*</sup>

**1** Center for Integrative Genomics, University of Lausanne, Lausanne, Switzerland, **2** Department of Genetic Medicine and Development, University of Geneva Medical School, Geneva, Switzerland

**The origin of new genes through gene duplication is fundamental to the evolution of lineage- or species-specific phenotypic traits. In this report, we estimate the number of functional retrogenes on the lineage leading to humans generated by the high rate of retroposition (retroduplication) in primates. Extensive comparative sequencing and expression studies coupled with evolutionary analyses and simulations suggest that a significant proportion of recent retrocopies represent bona fide human genes. We estimate that at least one new retrogene per million years emerged on the human lineage during the past ~63 million years of primate evolution. Detailed analysis of a subset of the data shows that the majority of retrogenes are specifically expressed in testis, whereas their parental genes show broad expression patterns. Consistently, most retrogenes evolved functional roles in spermatogenesis. Proteins encoded by X chromosome-derived retrogenes were strongly preserved by purifying selection following the duplication event, supporting the view that they may act as functional autosomal substitutes during X-inactivation of late spermatogenesis genes. Also, some retrogenes acquired a new or more adapted function driven by positive selection. We conclude that retroduplication significantly contributed to the formation of recent human genes and that most new retrogenes were progressively recruited during primate evolution by natural and/or sexual selection to enhance male germline function.**

Citation: Marques AC, Dupanloup I, Vinckenbosch N, Reymond A, Kaessmann H (2005) Emergence of young human genes after a burst of retroposition in primates. *PLoS Biol* 3(11): e357.

## Introduction

Together with more subtle genetic modifications such as gene expression changes and point substitutions, new genes with novel functions may have significantly contributed to the evolution of new phenotypes specific to humans and their closest evolutionary relatives. New duplicate genes may originate through (segmental) gene duplication by intra- or interchromosomal transposition of gene-containing segments [1,2]. Another mechanism, retroposition, generates new intronless gene copies (retrocopies) by reverse transcription of mRNAs derived from source genes (“parental” genes), followed by reintegration of the resulting cDNA in the genome [2,3]. Retroposition was commonly thought to generate nonfunctional gene copies (retropseudogenes) that accumulate disablements such as premature stop codons and frameshift mutations [4], because the copied mRNA is generally lacking regulatory elements. However, we and others have recently shown that retroposition has generated a significant number of new functional genes (retrogenes) in mammalian and invertebrate animal genomes [3,5,6].

Multiple studies have suggested a high rate of retroposition on the primate and rodent lineages [7–9], probably driven by the activity of L1 retrotransposable elements [10]. Thus, retroposition may also have provided abundant raw material for the formation of new genes on the primate lineage leading to humans, potentially generating many more retrogenes than the four primate-specific retrogenes (present in the human genome) with functional roles and/or expression in testis, brain, and lymphocytes previously described [11–14].

To assess the importance of retroposition for the creation

of new genes on the primate lineage leading to humans, we systematically screened the human genome for retrogenes that emerged during the primate burst of retroposition. Our results suggest an important role of retroposition in the formation of new genes and phenotypes in the recent evolution of the human genome.

## Results

### Age Distribution of Human Retrocopies

We identified 3,951 retrocopies (and their corresponding parental genes) in the human genome using a refinement of a previously published procedure [5] (see Materials and Methods). Among these, 705 retrocopies (~18%) are found to be “intact,” i.e., they show no disablements such as premature stop codons or frameshift mutations when compared to the open reading frame (ORF) of their parental genes. To assess the age distribution of retrocopies, we calculated nucleotide divergence at silent sites ( $K_S$ ) between retrocopies and their parental genes (Figure 1). Assuming neutral mutation rates of  $1\text{--}1.3 \times 10^{-9}$  substitutions per site per year [15], the high number of retrocopies with  $K_S \approx 0.1$

Received July 11, 2005; Accepted August 19, 2005; Published October 11, 2005  
DOI: 10.1371/journal.pbio.0030357

Copyright: © 2005 Marques et al. This is an open-access article distributed under the terms of the Creative Commons Attribution License, which permits unrestricted use, distribution, and reproduction in any medium, provided the original author and source are credited.

Abbreviations: MYA, million years ago; ORF, open reading frame

Academic Editor: Ken Wolfe, University of Dublin, Ireland

\*These authors contributed equally to this work.

\*To whom correspondence should be addressed. E-mail: Henrik.Kaessmann@unil.ch

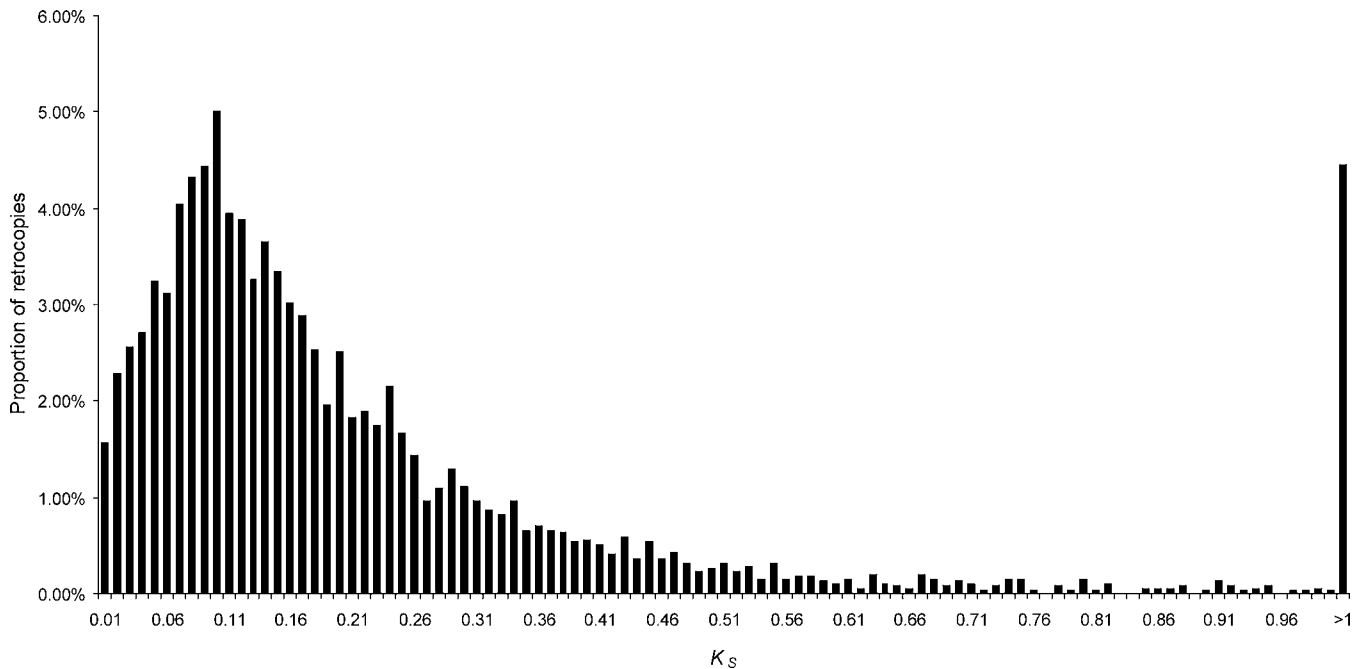

**Figure 1.**  $K_S$  Distribution for 3,951 Retrocopies

The peak at  $K_S \approx 0.1$  suggests a burst of retroposition on the primate lineage (see also text and Figure S1). Retrocopies with  $K_S > 1$  were pooled in a single bin.

DOI: 10.1371/journal.pbio.0030357.g001

suggests that the burst of retroposition reached its peak approximately 38–50 million years ago (MYA) on the primate lineage, in agreement with previous estimates [7,8]. The vast majority of retrocopies (91%) also show a divergence at silent sites much lower than that observed between human and mouse genes (Figures 1 and S1), indicating that they arose after the human–mouse split. Therefore, our data are consistent with a high retroposition activity on the primate lineage.

### Rate of New Retrogene Formation

To estimate the number of recent human retrogenes, we compared signatures of selective constraint between intact, potentially functional retrocopies, and retropseudogenes (assumed to be nonfunctional, i.e., evolving neutrally). To this end, we calculated the ratio of nonsynonymous to synonymous substitutions per site ( $K_A/K_S$ ) for retrocopy/parental gene pairs with a synonymous divergence of less than 0.15. This value approximately reflects the deepest neutral divergence in the primate tree between humans and the most divergent extant primate lineage [16,17], the lemurs, and corresponds to around 63 million years of primate evolution [18].

This analysis reveals a difference in the  $K_A/K_S$  distributions between intact copies and retropseudogenes (which may show low  $K_A/K_S$  ratios by chance), with a highly significant excess of intact copies for  $K_A/K_S < 0.5$  (Figure 2;  $p < 10^{-6}$ , Fisher's exact test).  $K_A/K_S$  significantly less than one is indicative of purifying selection [19]. However, in a pairwise analysis, where  $K_A/K_S$  reflects the average selective constraint on the retrocopy and parental gene,  $K_A/K_S < 0.5$  is indicative of purifying selection (i.e.,  $K_A/K_S < 1$ ) on both copies [5]. The 16% excess of intact retrocopies relative to retropseudogenes at  $K_A/K_S < 0.5$  corresponds to approximately 76 retrogenes

that were fixed on the primate lineage leading to humans through natural selection in the past 63 million years.

Based on a subset of the data for which a mouse ortholog of the human parental gene is available as an outgroup, we performed a similar analysis to calculate the  $K_A/K_S$  ratio on the retrocopy lineage itself (Figure S2). Again, we observed a significant excess ( $p < 2 \times 10^{-3}$ ) of intact retrocopies with low  $K_A/K_S$  values. When we extrapolate this excess to the whole dataset (475 intact retrocopies with  $K_S < 0.15$ ), this indicates that approximately 57 retrogenes in the human genome emerged in primates. This result is similar to the estimate based on the whole dataset using the pairwise  $K_A/K_S$  approach.

Together, these analyses suggest that approximately one retrogene per million years has emerged on the primate lineage leading to humans. It should be noted that the estimates based on this approach are restricted to cases with low  $K_A/K_S$  values averaged over the entire sequence, despite the fact that retrogenes may be found with higher  $K_A/K_S$  values due to the action of positive selection, a neutral phase of evolution upon emergence, or both (see Discussion).

### Functional Retrogenes

To identify and characterize individual functional retrogenes in the human genome that emerged recently in primate evolution, we selected 38 intact retrocopies with low divergence at silent sites from their parental genes ( $K_S < 0.15$ ) for further study (Table S1). To obtain an unbiased view of new retrogene formation, we chose these retrocopies independent of their average pairwise  $K_A/K_S$  values, as new genes may show high, intermediate, or low  $K_A/K_S$  values, depending on the type and extent of selection acting after the duplication event [3]. We determined the age of the 38

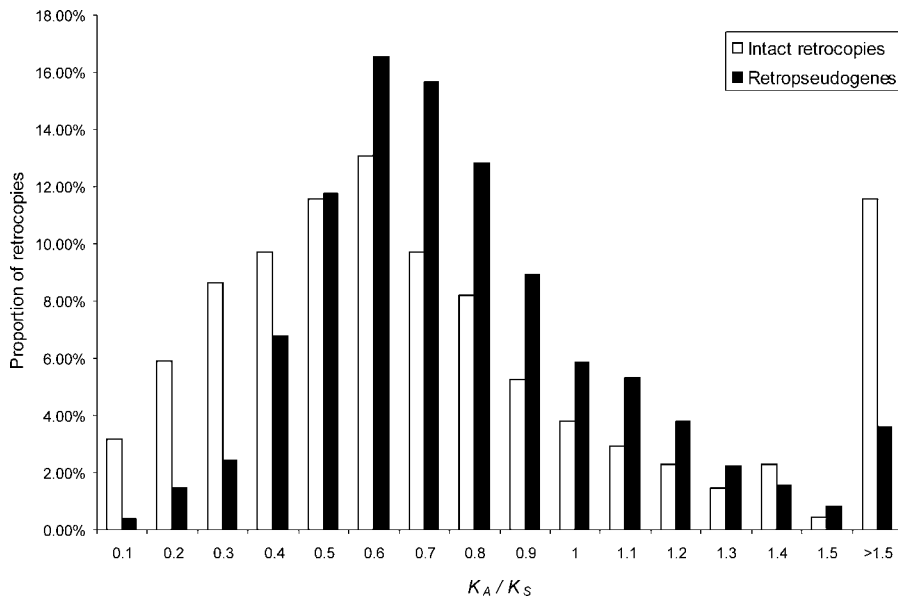

**Figure 2.**  $K_A/K_S$  Distributions for 475 Intact Retrocopies and 1,554 Retropseudogenes with  $K_S < 0.15$

Note that we tested that the differences observed for  $K_A/K_S < 0.5$  are not explained by differences in GC content (see Materials and Methods for details). The bin with  $K_A/K_S > 1.5$  includes estimates where  $K_S = 0$  ( $K_A/K_S = \infty$ ).

DOI: 10.1371/journal.pbio.0030357.g002

retrocopies by screening for their presence or absence in eight primate genomes.

This phylogenetic dating approach revealed retrocopies that emerged throughout primate evolutionary history (Table S1). For instance, we identified five retrocopies present in all Old World primates, five hominoid-specific retrocopies, and six copies unique to humans. Our dating revealed that the *PGAM3* retrogene, previously shown to have been shaped by positive selection [11], originated recently in the ancestor of humans and the African apes, less than 14 MYA [18]. We also found that the *PABP3* retrogene, for which a function in testis was recently demonstrated [20], emerged in primates.

In order to identify functional retrogenes among these dated retrocopies, we used an approach that combines comparative genomic sequencing and evolutionary simulations. First, we selected only retrocopies with a minimum sequence length (>600 bp) and age (>8 million years; i.e., presence in humans and African apes), characteristics estimated to provide sufficient statistical power for the simulation approach (see Materials and Methods). We sequenced these copies in all species carrying them. Sequence alignments show that eight of these 23 retrocopies are intact in all species, whereas the remaining copies carry one or more stop codons and/or frameshift mutations in one or more lineages (Table 1).

Next, we used a simulation approach (see Materials and Methods), which is based on the basic assumption that under neutrality, an intact retrocopy will accumulate deleterious mutations (stop codons or frameshifts) over time that will disrupt its ORF and may eventually preclude gene function, whereas under functional constraint, natural selection will prevent the accumulation of deleterious mutations in the retrocopy sequence.

Our simulation approach estimates the probability that a gene copy would have retained its ORF since the duplication event, in all or most species in which it is present, if it had

evolved neutrally along all lineages of the species tree. In parallel, this approach tests whether the number of non-synonymous substitutions that accumulated since the retroposition event along the different branches of the species phylogeny is consistent with neutral evolution.

The simulations revealed that seven retrocopies are unlikely to have remained intact in all (or most) species if they had evolved neutrally throughout their evolutionary history, even after correcting for multiple tests ( $p < 0.05$ ; Table 1; Figures S3–S8). For example, a retrocopy on Chromosome 1 (*RBMXL1*), which we find to be intact in all six Old World primates carrying it, showed at least one disablement in each of  $10^5$  simulations during which the retrocopy was evolving neutrally after the duplication event (Figure 3A). This strongly suggests that the ORFs of all seven retrocopies were selectively preserved after duplication. Therefore, these copies very likely represent functional genes. Among these seven genes is also *PABP3*, for which a functional protein has been previously described [20], confirming that our simulation approach correctly predicts the functionality of recent genes.

Five of the seven copies accumulated fewer nonsynonymous substitutions than expected under neutrality, lending further support to the notion that these copies were preserved through natural selection (Figures 3B, 3C, and S3–S8). The remaining genes (*NACA2* and *GMCL2*) may have been affected by positive selection at a subset of sites or may have experienced a period of relaxed selective constraint after duplication, rendering the average number of nonsynonymous substitutions not significantly different from that expected under a neutral evolutionary process.

The seven retrogenes identified here (Table 1) originated between 18 and 63 MYA [18] in the ancestor of hominoids (*CDC14B2*, *eIF-2-gamma2*, and *GMCL2*), Old World primates (*RBMXL1* and *KIF4b*), and anthropoid primates (*NACA2* and *PABP3*). On the basis of the functions of their parental genes

**Table 1.** Retrocopies Tested for Identifying Retrogenes

| Parental Gene Name <sup>a</sup> | Parental Location | Retrogene Name <sup>b</sup> | Retrocopy Location | Age <sup>c</sup>   | Lineages Disabled <sup>d</sup> | $P_{dis}$ <sup>e</sup> | $P_{NANS}$ <sup>e</sup> |
|---------------------------------|-------------------|-----------------------------|--------------------|--------------------|--------------------------------|------------------------|-------------------------|
| <i>ADH5</i>                     | 4                 | —                           | 6                  | Hominoids          | HI                             | $2 \times 10^{-4}$     | 0.913                   |
| <i>C2orf4</i>                   | 2                 | —                           | 21                 | African apes       | Pt                             | 0.440                  | 0.833                   |
| <i>CDC14B</i>                   | 9                 | <i>CDC14B2</i>              | 7                  | Hominoids          | HI                             | $<10^{-5}$ *           | $<10^{-5}$ ***          |
| <i>CDC20</i>                    | 1                 | —                           | 9                  | Hominoids          | Pp and HI                      | $10^{-4}$              | 0.141                   |
| <i>CTAGE5</i>                   | 14                | —                           | 10                 | Old World primates | Gg and HI                      | $10^{-4}$              | 0.792                   |
| <i>DNAJC9</i>                   | 10                | —                           | 20                 | Great apes         | Pp                             | 0.010                  | 0.143                   |
| <i>eIF-2-gamma</i>              | X                 | <i>eIF-2-gamma2</i>         | 12                 | Hominoids          | —                              | $<10^{-5}$ *           | 0.001***                |
| <i>GMCL1</i>                    | 2                 | <i>GMCL2</i>                | 5                  | Hominoids          | —                              | $<10^{-5}$ *           | 0.004                   |
| <i>KIF4A</i>                    | X                 | <i>KIF4B</i>                | 5                  | Old World primates | —                              | $<10^{-5}$ *           | $<10^{-5}$ ***          |
| <i>NACA</i>                     | 12                | <i>NACA2</i>                | 17                 | Anthropoids        | HI                             | $<10^{-5}$ *           | 0.317                   |
| <i>NIP30</i>                    | 16                | —                           | 4                  | Old World primates | Pp, HI, and Cas                | $10^{-4}$              | 0.293                   |
| <i>NSEP1</i>                    | 1                 | —                           | 14                 | African apes       | Gg                             | 0.600                  | 0.339                   |
| <i>PABPC1</i>                   | 8                 | <i>PABP 3</i>               | 13                 | Anthropoids        | —                              | $<10^{-5}$ *           | $<10^{-5}$ ***          |
| <i>PGAM1</i>                    | 10                | —                           | X                  | African apes       | —                              | 0.091                  | 0.411                   |
| <i>POU5F1</i>                   | 6                 | —                           | 8                  | Great apes         | Gg and Pp                      | 0.002                  | 0.254                   |
| <i>PSMB3</i>                    | 17                | —                           | 2                  | Great apes         | Pp                             | 0.045                  | 0.623                   |
| <i>PTPNS1</i>                   | 20                | —                           | 22                 | Great apes         | —                              | $6 \times 10^{-4}$     | 0.271                   |
| <i>PTTG1</i>                    | 5                 | —                           | 8                  | Old World primates | Gg and Cas                     | 0.002                  | 0.254                   |
| <i>RBMX</i>                     | X                 | <i>RBMXL1</i>               | 1                  | Old World primates | —                              | $<10^{-5}$ *           | $<10^{-5}$ ***          |
| <i>RPE</i>                      | 2                 | —                           | 10                 | Hominoids          | Gg and Pp                      | 0.108                  | 0.329                   |
| <i>TPI1</i>                     | 12                | —                           | 1                  | African apes       | —                              | 0.097                  | 0.348                   |
| <i>TPM3</i>                     | 1                 | —                           | 16                 | Great apes         | Gg and Pp                      | 0.099                  | 0.763                   |
| <i>UBE2S</i>                    | 19                | —                           | 17                 | African apes       | Pt                             | 0.622                  | 0.452                   |

$P_{dis}$  and  $P_{NANS}$  correspond to the  $p$ -value associated with the statistical tests (based on the number of deleterious mutations and on the ratio of nonsynonymous to synonymous substitutions, respectively) described in the Materials and Methods. We used a Bonferroni procedure for multiple test correction:  $P_{dis}$  was corrected by the total number of retrocopies with  $K_S < 0.15$  (2,029 retrocopies) and  $P_{NANS}$  by the number of tests performed (23 tests).

<sup>a</sup>Parental gene names are taken from the HUGO gene nomenclature.

<sup>b</sup>Retrogenes were named after their parent; retrocopies for which functionality could not be unambiguously supported are not labeled (—).

<sup>c</sup>Based on phylogenetic distributions of retrocopies and corresponding to an origin of approximately 7–14 MYA in the African ape (human, chimpanzee, and gorilla) ancestor, 14–18 MYA (great apes: African apes and orangutan), 18–25 MYA (hominoids: great apes and gibbon), 25–40 MYA (Old World primates: hominoids and Old World monkeys), and 40–63 MYA (anthropoids: Old World primates and New World monkeys). Age estimates are based on Goodman [18].

<sup>d</sup>Species abbreviations are as follows: Pt: *Pan troglodytes*, Gg: *Gorilla gorilla*, Pp: *Pongo pygmaeus*, HI: *Hylobates lar*, Cas: *Cercopithecus aethiops sabaeus* (African green monkey).

<sup>e</sup>Asterisks indicate significant values after correction for multiple tests: \* $p < 0.05$ , \*\*\* $p < 0.001$ . All other values are not significant.

DOI: 10.1371/journal.pbio.0030357.t001

(Table S1) or gene family members [20–28], these retrogenes can be predicted to play diverse functional roles in RNA processing and transport (*RBMXL1*), initiation of translation (*eIF-2-gamma2* and *PABP3*), mRNA stability (*PABP3*), transcriptional regulation and protein biosynthesis (*CDC14B2*, *GMCL2*, and *NACA2*), and chromosome condensation and segregation (*KIF4b*).

### Evolutionary Fate of New Retrogenes

Newly emerged retrogenes may evolve new functional roles through adaptive evolution of encoded proteins and/or by developing new spatial or temporal expression patterns. To trace the functional adaptation of the seven novel retrogenes identified here, we reconstructed phylogenetic trees based on the primate retrocopy and parental gene sequences and then scrutinized substitutional patterns on the retrogene branches in a maximum likelihood selection framework (Table 2). We also analyzed spatial gene expression patterns in 20 human tissues using RT-PCR.

Strikingly, we found that all seven retrogenes are exclusively or predominantly transcribed in testis, whereas transcripts of their parental genes were detected in all tissues tested (Figure 4). Three of these retrogenes (*eIF-2-gamma2*, *RBMXL1*, and *KIF4b*) derive from parental genes located on the X chromosome (see Table 1). Our selection analyses show that substitutional models allowing for sites under purifying selection and neutrally evolving sites on the retrogene lineages after the duplication event provide the best fit for these genes. In agreement with our simulations (Table 1),

purifying selection has shaped most of their codons (54%–77%; see Table 2), which suggests that ancestral/parental protein functions are likely preserved in these genes.

We have previously shown that X chromosomal genes in mammals generated a statistically significant excess of (autosomal) retrogenes relative to genes on other chromosomes [5]. One possible explanation for this pattern was that X chromosomal genes produced functional counterparts on autosomes that can be recruited during male meiosis when X chromosomal genes are silenced or during haploid stages of spermatogenesis [29,30]. Our findings that the coding sequences of the three recent X-derived genes identified here appear to be preserved by purifying selection at early stages of their evolution and that all genes are expressed (exclusively or most strongly) in testis (Figure 4) lend further support to this hypothesis. These retrogenes (*eIF-2-gamma2*, *RBMXL1*, and *KIF4b*) also support our previous notion that the generation of functional autosomal substitutes for genes on the X chromosome is an ongoing process [5]. In fact, this gene “movement” appears to have progressively enhanced male germline functions in primate evolution.

The four remaining genes stem from autosomes (see Table 1). Interestingly, the *Drosophila* ortholog (*germ cell-less*) of *GMCL1*—the parental gene of the hominoid-specific retrogene *GMCL2* identified here—was shown to be essential for germ cell formation [26,31,32]. Furthermore, the mouse ortholog of *GMCL1* [33] shows its highest expression in testis and has been shown to function as a transcriptional repressor [27]. Together, these results suggest that *GMCL2* might have

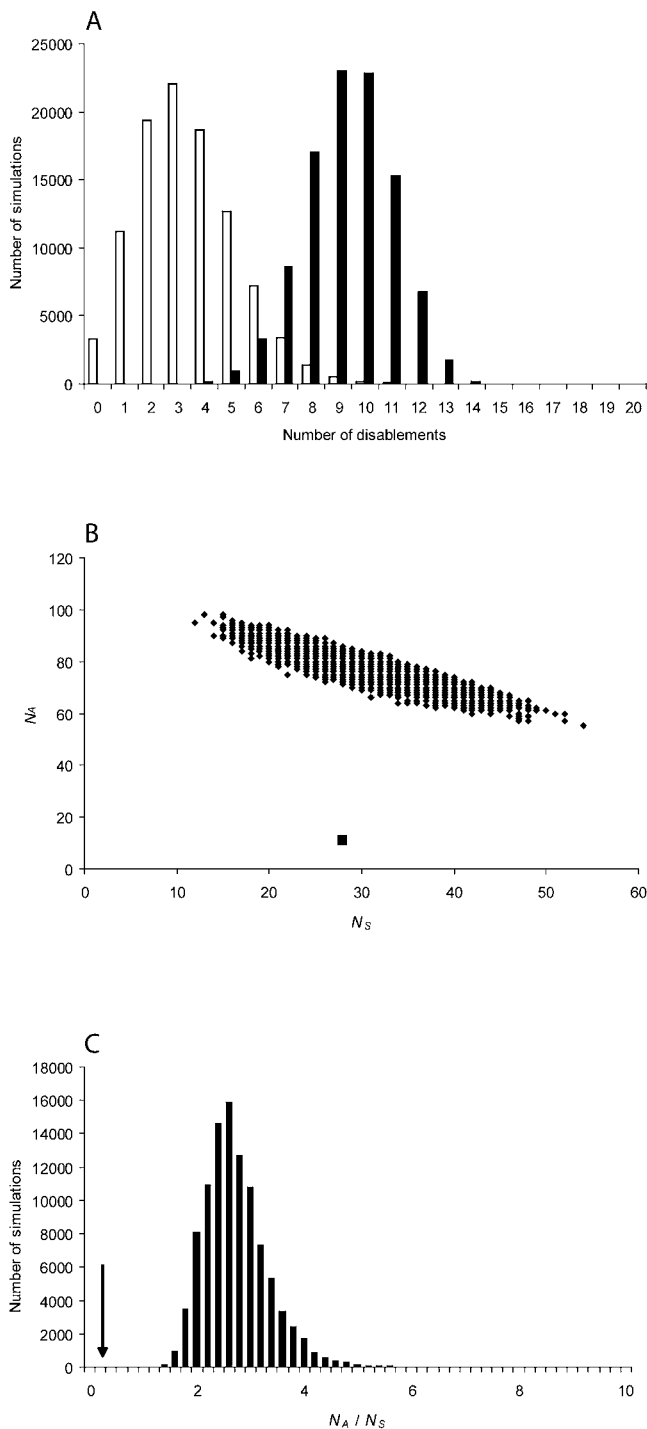

**Figure 3.** Illustration of the Simulation Results Used to Support Functionality of Retrogenes for One Case (*RBMXL1*)

(A) Distribution of the number of disablements observed in  $10^5$  simulations of the *RBMXL1* retrogene evolution under neutrality. The frequency distribution of stop codons is shown in white, and that of deleterious indels in black. All of the simulations showed at least one mutation disrupting the ORF (see text); simulations without stop codons all showed several frame-disrupting indels (the minimum number of such indels in each simulation is four).

(B) Nonsynonymous ( $N_A$ ) and synonymous ( $N_S$ ) substitutions observed in  $10^5$  simulations of neutral *RBMXL1* retrogene evolution (diamonds). The black square indicates the observed nonsynonymous and synonymous substitutions in the *RBMXL1* primate phylogeny.

(C) Ratio of nonsynonymous to synonymous substitutions in  $10^5$  simulations of *RBMXL1* retrogene evolution in the primate lineages. The arrow indicates the observed ratio of nonsynonymous to synonymous substitutions in the *RBMXL1* primate phylogeny. DOI: 10.1371/journal.pbio.0030357.g003

been preserved through male selection to enhance testis function in hominoids.

The other three retrogenes (*CDC14B2*, *NACA2*, and *PABP3*) show a statistically significant excess of nonsynonymous to synonymous substitutions ( $K_A/K_S > 1$ ,  $p < 0.01$ ) for a subset of sites ( $\sim 4.7\%$ ,  $\sim 27.6\%$ , and  $\sim 28.4\%$  of sites, respectively), indicative of accelerated protein evolution driven by positive Darwinian selection (see Table 2). This may suggest new or more adapted functional roles of these retrogenes in transcriptional regulation and protein biosynthesis in testis.

For *PABP3*, the maximum likelihood procedure identifies many codons as being positively selected (Table 2; Figure 5). Positively selected sites are present in all major domains of the *PABP3*-encoded protein such as the poly(A)-binding domain (Figure 5). Interestingly, a recent study not only supports the presence and functionality of the *PABP3*-encoded protein but also provides evidence for altered poly(A)-binding affinity [20]. However, positively selected sites particularly cluster in a region that was shown in PABP proteins to be involved in interactions with not only other proteins such as translation initiation factors but also viruses that target this region to shut off protein synthesis in the host cell (Figure 5) [20]. This may indicate that *PABP3* has evolved new or enhanced protein interaction properties and/or an altered viral susceptibility compared to its parent, *PABP1*. Testis expression of *PABP3* appears to be restricted to a later phase of spermatogenesis, during which the activity of *PABP1* is repressed [20]. This suggests that *PABP3* functionally replaces its parent to enhance translation and/or RNA stability during male meiosis.

*PABP3* provides an intriguing example of a retrogene that has adapted functionally by evolving a new spatial and temporal expression pattern as well as new protein properties relative to its parent. We have shown that this adaptation was driven by positive selection and occurred within the past  $\sim 35$ – $63$  million years since the duplication event that gave rise to this gene in the common ancestor of anthropoid primates [18]. The high  $K_A/K_S$  ratio (2.8) on the human lineage after the separation from that of the chimpanzee (Figure S9) might suggest that adaptation shaped human *PABP3* properties until recently in human evolution.

## Discussion

### Functional Retrogenes

Although gene duplications of different types have been prevalent in primate evolution, a more detailed picture with respect to the functionality of individual gene copies and their potential to contribute to human- and/or primate-specific phenotypes is only beginning to emerge [12,13,34–38]. Demonstrating the functionality of recently duplicated genes is hampered by their close similarity to original copies, which complicates both statistical and experimental inferences. Here, we have used a combination of comparative genomic sequencing, evolutionary analysis, and gene expression experiments to estimate the number of



**Table 2.** PAML Analyses for the Seven Retrogenes Identified by the Simulations Approach

| Retrogene           | Model        | $\omega_0$     | $\omega_1$     | $\omega_2^a$      | LogL      | Sites with $\omega > 1^b$ |
|---------------------|--------------|----------------|----------------|-------------------|-----------|---------------------------|
| <i>CDC14B2</i>      | M1 (neutral) | 0.080 (83.45%) | 1.000 (16.55%) |                   | -3,187.19 |                           |
|                     | A            | 0.098 (87.57%) | 1.000 (7.68%)  | 4.459*** (4.74%)  | -3,178.07 | 1 site                    |
| <i>elf-2-gamma2</i> | M1 (neutral) | 0.037 (96.76%) | 1.000 (3.24%)  |                   | -2,731.48 |                           |
|                     | A            | 0.000 (74.71%) | 1.000 (0.55%)  | 1.736 (24.74%)    | -2,688.77 | NA                        |
| <i>GMCL2</i>        | M1 (neutral) | 0.100 (85.41%) | 1.000 (14.59%) |                   | -3,683.64 |                           |
|                     | A            | 0.023 (54.05%) | 1.000 (6.03%)  | 1.690 (39.92%)    | -3,654.30 | NA                        |
| <i>KIF4B</i>        | M1 (neutral) | 0.076 (72.21%) | 1.000 (27.79%) |                   | -8,759.96 |                           |
|                     | A            | 0.019 (54.75%) | 1.000 (16.74%) | 1.363 (28.51%)    | -8,736.16 | NA                        |
| <i>NACA2</i>        | M1 (neutral) | 0.047 (79.40%) | 1.000 (20.60%) |                   | -1,501.98 |                           |
|                     | A            | 0.000 (71.13%) | 1.000 (1.25%)  | 3.395*** (27.62%) | -1,464.70 | 10 sites                  |
| <i>PABP3</i>        | M1 (neutral) | 0.038 (75.74%) | 1.000 (24.26%) |                   | -4,451.12 |                           |
|                     | A            | 0.007 (71.65%) | 1.000 (0.00%)  | 1.834** (28.35%)  | -4,394.13 | 31 sites                  |
| <i>RBMXL1</i>       | M1 (neutral) | 0.075 (99.31%) | 1.000 (0.69%)  |                   | -2,210.79 |                           |
|                     | A            | 0.018 (76.96%) | 1.000 (0.00%)  | 1.000 (23.04%)    | -2,196.10 | NA                        |

The likelihood models used are described in the Materials and Methods.

<sup>a</sup>We tested whether  $\omega_2$  for the third category of sites on the retrogene lineages was significantly different from one using a likelihood ratio test comparing model A to model A with  $\omega_2$  fixed to one (see Materials and Methods): \*\* $p < 0.01$ , \*\*\* $p < 0.001$ .

<sup>b</sup>NA, test not applicable.

DOI: 10.1371/journal.pbio.0030357.t002

recent human genes that arose by retroposition and to characterize their functions.

Our study almost triples the number of described primate-specific retrogenes from four to 11 [11–14]. However, on the basis of a systematic analysis of selective signatures in retrocopy sequences, we estimate that approximately 57–76 retrogenes emerged during and after the primate burst of retroposition. This tentative estimate represents a lower bound for several reasons. First, our in silico approach (comparing  $K_A/K_S$  values between intact and retropseudo-gene copies) only detects copies with low  $K_A/K_S$  values, whereas newly emerged genes often show higher  $K_A/K_S$  values owing to the action of positive selection at a subset of sites ( $K_A/K_S > 1$ ) and/or a neutral phase of evolution after duplication [3,12]. Second, retrocopies with disablements in their ORFs (as defined by their parents) are treated as pseudogenes in this analysis, although new retrogenes may

emerge from truncated coding regions [3,13]. It is also known that new splicing signals in a coding region that contains frameshifts or premature stop codons may evolve to define a new intron or to generate chimeric transcripts with nearby or “host” genes [3]. Finally, duplicate “pseudogene” copies may play functional roles by virtue of their RNAs regulating closely related paralogous genes [39,40]. At any rate, our results suggest that in addition to other types of duplications [1], retroposition significantly contributed to new gene formation in primates.

### Retrogenes and Male Functions

It is remarkable that all seven retrogenes identified in this report are expressed predominantly or exclusively in testis, whereas their parents are all expressed ubiquitously. A preliminary survey of retrocopy transcription using expressed sequence tag databases suggests that this observation may

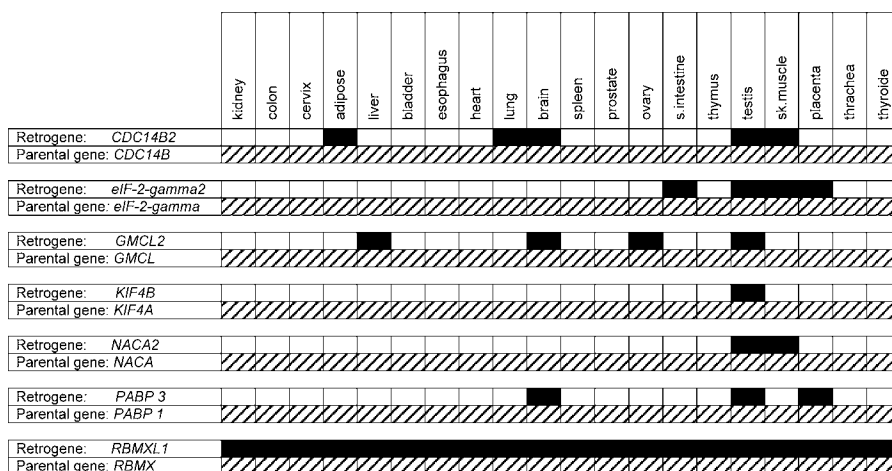

**Figure 4.** Expression Pattern of Retrogenes and Parents Determined by RT-PCR

Black boxes indicate retrogenes; hatched boxes indicate parental genes. Note that in all cases testis expression of the retrogene was the strongest, as indicated by the semiquantitative PCR procedure (data not shown).

DOI: 10.1371/journal.pbio.0030357.g004

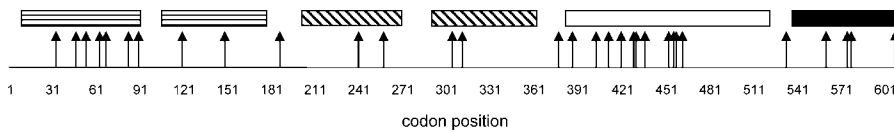

**Figure 5.** Evidence for Positive Selection on *PABP3* Codons

The rectangles correspond to the different domains of the PABP1 protein: RNA poly(A)-tail-binding domains (vertical lines), RNA-binding domains (hatched), protein-protein interaction domain (white), and PABP homo-oligomerization domain (black). Positions of positively selected codons with high posterior probabilities ( $>0.95$ ) are indicated by arrows.

DOI: 10.1371/journal.pbio.0030357.g005

reflect a general pattern (data not shown). Several factors may contribute to this effect. For example, chromatin remodeling [41] and abundance of RNA polymerase II complexes during late phases of male meiosis [42] lead to a state of “hyper-transcription” [43], which may allow retrocopies to become initially transcribed in testis. This may also have facilitated transcription of new genes arising from pericentromeric segmental duplications [44,45]. Thus, there is a mechanistic bias that may favor testis expression of new genes.

However, our results suggest that testis expression is often not merely a by-product of new retrogene formation but that natural selection may have favored the recruitment of testis-specific regulatory elements to enhance the beneficial effects of the initial mechanistically driven testis transcription. Consistently, we can infer a testis function for five of the seven primate retrogenes identified here and for two of the four previously identified retrogenes (*TAFIL* and *UTPI4C*; [13,14]). Five retrogenes (*eIF-2-gamma2*, *RBMXL1*, *KIF4b*, *TAFIL*, and *UTPI4C*) stem from the X chromosome and probably either substitute for their parental genes during male meiosis [30] or otherwise enhance male germline function [46]. For one retrogene (*GMCL2*), a function in sperm formation can be postulated based on studies of parental orthologs. Finally, *PABP3* functionally adapted to late spermatogenesis both on the protein sequence level and by developing a highly specific expression pattern [20].

Sex- and reproduction-related genes are generally recognized as a class of rapidly evolving genes, particularly genes involved in male reproduction [47]. Possible causes include sperm competition, sexual conflict, and selection for reproductive isolation [48]. A comparison of the human and mouse genomes revealed an excess of lineage-specific expansions of genes related to reproduction as well as an accelerated protein evolution of such genes [49]. Together, these observations suggest that duplicate gene copies may have provided important raw material for rapid testis evolution in primates. Specifically, gene duplication may allow one copy of the duplicate pair to specialize in testis function, while the other is selectively preserved to sustain a role in somatic tissues [50–52]. Our data suggest that retroduplication may have provided a means to allow for such decoupling of functions in primates. Indeed, we show that selection to attain enhanced male germline function has progressively fixed and adapted retroposed gene copies on the primate lineage leading to humans.

## Materials and Methods

**Retrocopy screen.** We retrieved all peptide sequences (categories: known and novel) from the Ensembl ([53]; <http://www.ensembl.org/index.html>) database (version 29). To screen for retrocopies, these peptide sequences were used as queries in translated similarity

searches against the complete human genome (NCBI genome release 35) sequence using tBLASTn [54]. Adjacent homology matches were merged in a series of parsing steps using Perl scripts, combining only nearby matches (distance  $< 40$  bp) that were likely not separated by introns. We also required that query and merged target sequences had significant similarity on the amino acid level (amino acid identity  $> 50\%$ ) and aligned to one another over more than 70% of the length of their sequence (minimum length: 50 amino acids). Next, we performed similarity searches of the merged sequences against all Ensembl genes (intron-containing and intronless) using FASTA. We kept only copies where the closest hit was an Ensembl peptide with multiple coding exons (putative parental gene). Merged sequences for which the closest match was an intronless gene were excluded from the data (e.g., to avoid intronless genes of other types such as olfactory receptor genes). We also confirmed the absence of introns in these retrocopies by mapping parental intron locations onto the alignments. We required that parental introns map within the alignments between parents and retrocopies and be larger than 80 bp. This threshold was chosen to ensure that real introns are missing in the retrocopies; 80 bp is larger than the gap size (40 bp) allowed in the merging step, it avoids mapping of small gaps in parental exons erroneously annotated as introns, and it takes into account that the majority of human introns are  $\sim 80$  bp or larger [55].

**Samples.** Primate DNA samples were mainly obtained from the ECACC repository (Wiltshire, United Kingdom): chimpanzee (*Pan troglodytes*), gorilla (*Gorilla gorilla*), orangutan (*Pongo pygmaeus*), gibbon (*Hyllobates lar*), Old World monkey (African green monkey, *Cercopithecus aethiops sabaeus*), and New World monkey (owl monkey, *Aotus trivirgatus*). Lemur (*Lemur catta*) and tupaia (*Tupaia glis*) DNA samples were obtained from Institut des Sciences de l'Évolution, Montpellier University 2.

**PCR and sequencing reactions.** PCR amplifications were performed in a Mastercycler gradient (Eppendorf, Hamburg, Germany) using either *Taq* DNA Polymerase or ProofStart DNA Polymerase from Qiagen (Valencia, California, United States). PCRs were performed according to the instructions of the manufacturer. For sequencing, amplified PCR products were reamplified using a pair of nested primers. The resulting PCR products were purified using the MinElute PCR Purification Kit or QIAquick Gel Extraction Kit from Qiagen. From these PCR products, both strands of the retrogene coding sequence were determined using the BigDye 3.1 cycle sequencing kit (PerkinElmer, Wellesley, California, United States). The sequencing reactions were run on an ABI 3730 automated sequencer (Applied Biosystems, Foster City, California, United States). Parental and retrogene expression patterns were analyzed using PCR and a cDNA panel of 20 different human tissues. Experiments were repeated twice to confirm the expression pattern. Unique primer pairs were designed for both parental gene and retrogene, based on ClustalX alignments of parental and retrogene cDNA sequences. The cDNA panel was synthesized using the FirstChoice Human Total RNA Survey panel from Ambion (Austin, Texas, United States) and a SuperScript II First-Strand Synthesis System RT-PCR (Invitrogen, Carlsbad, California, United States). Reactions without reverse transcriptase were done in parallel as negative controls for all 20 tissues. RT-PCR amplifications were performed in a Mastercycler gradient (Eppendorf) using JumpsStart DNA Polymerase (Sigma-Aldrich, St. Louis, Missouri, United States) using standard conditions as recommended by the supplier. Products were purified using the MinElute PCR Purification Kit from Qiagen and sequenced using the same pair of primers. Obtained sequences for each retrogene were then aligned with both retrogene and parental gene sequences using ClustalX. To ensure that RT-PCR products were derived from the retrogene, nucleotides at diagnostic sites that discriminate between retrogene and parental gene were manually confirmed. All oligonucleotide sequences used for PCR and sequencing are available upon request.

**Age of retrocopies.** We estimated the age of retroposition events by calculating coding sequence divergence at synonymous sites ( $K_S$ ) between each retrocopy and the corresponding parental gene. The same analysis was performed for parental genes and their mouse orthologs. Codon sequences were aligned on the basis of the translated sequence alignment using the EMBOSS package [56]. In all alignments, the coding sequence of the parental gene was used as a reference. Pairwise  $K_S$  statistics were estimated using the YN00 program of PAML [57] version 3.14. We note that the ages of retrocopies may be slightly underestimated by this approach, because silent sites are not always completely neutral ([58] and references therein).

Using a phylogenetic dating approach, we determined the age of individual retrocopies by screening for their presence or absence in primate genomes using PCR with primers flanking the insertion site. We confirmed that the insertion site in species not carrying the copy reflects the expected size of the ancestral state (before retrocopy insertion [12]). For five of the retrogenes analyzed in detail, the ancestral state of the insertion site was further confirmed by sequencing. For the two retrogenes (*NACA2* and *PABP3*) present in all anthropoid primates (hominoids, Old World monkey, and New World monkey), we confirmed their absence in lemur and tupaia using several different primer pairs located in their coding regions, as the insertion site could not be amplified using primers in the flanking region.

**Rate of retrogene formation.** Pairwise  $K_A$  and  $K_S$  statistics for all retrocopies were estimated using the YN00 program of PAML [57] version 3.14. To estimate  $K_A/K_S$  on the retrocopy lineage itself, we performed the same analysis but compared the retrocopy and the ancestral sequence of the retrocopy at the time point of retroposition (estimated by a maximum likelihood procedure; using the codeml program of PAML [57] and the mouse ortholog of the parent as outgroup).  $K_A/K_S$  is influenced by the GC content at synonymous sites of the parent as well as by the GC content of the genomic region surrounding the retrogene [59]. In particular, retrocopies derived from parental genes with high GC that insert into regions of low GC may show low  $K_A/K_S$  driven by local adaptation to local GC. To test whether GC differences between intact and retroseudogene copies with low  $K_A/K_S$  (<0.5) explain differences in  $K_A/K_S$  between these two types of sequences, we first estimated the GC content at 4-fold degenerate sites and in regions (20 kb) upstream and downstream of the retrocopies, according to the previous analysis [59]. Intact retrocopies and retroseudogenes showed no significant difference when analyzing copies stemming from high-GC (>60% at 4-fold degenerate sites) parents that inserted into low-GC (lower than median value of GC) regions (52 of 130 intact retrocopies versus 60 of 172 retroseudogene copies,  $p = 0.4$ ). Thus, the difference in the distributions for  $K_A/K_S < 0.5$  between the two types of retrocopies is not accounted for by differences in GC but is likely explained by purifying selection on a number of intact retrocopies.

**Functionality of retrocopies.** Codon sequences were aligned on the basis of the translated sequence alignments using the EMBOSS package [56]. Phylogenetic trees were based on the established evolutionary relationships of primates [18]. In the simulation approach used to support functionality of retrocopies, we reconstructed the ancestral state of the retrocopy at the time point of duplication based on this phylogeny using the codeml program of PAML [57] and the parent as an outgroup. Then, we repeatedly simulated the evolution of this ancestral sequence throughout the phylogeny assuming neutral evolution (i.e., point mutations and indels accumulate according to a neutral model of sequence evolution). We used the Kimura-2 parameter model [60] for sequence evolution (assuming a transition/transversion ratio of two), a point mutation rate of  $1.0 \times 10^{-9}$  per site per year as suggested previously for hominoids and Old World monkeys [15], and an indel rate of  $1.0 \times 10^{-10}$  per site per year [61]. Indels with a multiple of three nucleotides (17%) were assumed to be nondeleterious as they do not disrupt the ORF. The simulations provided a probability ( $P_{dis}$ ) for each gene, which corresponds to the number of simulated datasets with a number of deleterious mutations on the different lineages that is smaller or equal to our observation. In parallel, the accumulation of nonsynonymous and synonymous substitutions in the simulated phylogenies was monitored. Thus, we could compare the observed ratio of nonsynonymous to synonymous substitutions to its null distribution estimated by the simulations. The parental genes of the seven retrogenes for which functionality was supported showed low to medium GC content (22%–52%) at 4-fold degenerate, similar to the GC content of the regions flanking their insertion sites (33%–47%). Thus, GC effects (see above; [59]) are unlikely to explain

nonsynonymous/synonymous distribution patterns, which are therefore indicative of purifying selection for several cases.

**Selection analysis using PAML.** To test for the presence of sites under diversifying selection ( $K_A/K_S > 1$ ) on the retrogene lineages, we compared model M1 and model A as implemented in codeml from the PAML package [57] using likelihood ratio tests [62]. Model M1 assumes two classes of sites for the sequences in the whole phylogeny: sites under purifying selection ( $K_A/K_S < 1$ ) and neutral sites ( $K_A/K_S = 1$ ). Model A adds a third class of sites in the retrogene lineages, with  $K_A/K_S$  as a free parameter, allowing for sites with  $K_A/K_S > 1$ . We also compared this model A to a modified model where  $K_A/K_S$  is fixed at one. Sites under positive selection in the retrogene lineages were identified using the Bayesian approach as implemented in codeml [63]. Note that with respect to *CDC14B2*, the human and chimpanzee sequences have lost the original translation initiation codon (methionine) used by the parental gene (which may have led to the annotation of this gene as a VEGA pseudogene, OT-THUMG00000033880) and gained a putatively new methionine start codon at position 31. The selection tests show similar (statistically significant) results when either the original full-length sequence alignment or a shorter alignment starting from position 31 is used (data not shown).

## Supporting Information

**Figure S1.** Distribution of  $K_S$  between Parental Genes and Their Orthologs in Mouse

Found at DOI: 10.1371/journal.pbio.0030357.sg001 (644 KB EPS).

**Figure S2.**  $K_A/K_S$  on the Retrocopy Lineage: Comparison of the  $K_A/K_S$  Distributions for Intact Retrocopies and Retroseudogenes

The mode of the  $K_A/K_S$  distributions is smaller than one (usually expected under neutrality), owing to the effect previously described [59]. White bars correspond to intact retrocopies, and dark bars to retroseudogene copies.

Found at DOI: 10.1371/journal.pbio.0030357.sg002 (636 KB EPS).

**Figure S3.** Simulation Results for *CDC14B2*

See legend of Figure 3.

Found at DOI: 10.1371/journal.pbio.0030357.sg003 (7.9 MB PDF).

**Figure S4.** Simulation Results for *eIF-2-gamma2*

See legend of Figure 3.

Found at DOI: 10.1371/journal.pbio.0030357.sg004 (6.6 MB PDF).

**Figure S5.** Simulation Results for *GMCL2*

See legend of Figure 3.

Found at DOI: 10.1371/journal.pbio.0030357.sg005 (6.6 MB PDF).

**Figure S6.** Simulation Results for *KIF4B*

See legend of Figure 3.

Found at DOI: 10.1371/journal.pbio.0030357.sg006 (6.6 MB PDF).

**Figure S7.** Simulation Results for *NACA2*

See legend of Figure 3.

Found at DOI: 10.1371/journal.pbio.0030357.sg007 (6.7 MB PDF).

**Figure S8.** Simulation Results for *PABP3*

See legend of Figure 3.

Found at DOI: 10.1371/journal.pbio.0030357.sg008 (6.6 MB PDF).

**Figure S9.** Phylogenetic Trees for the Seven Retrogenes Identified in This Study

Maximum likelihood  $K_A/K_S$  values and the estimated number of nonsynonymous versus synonymous substitutions (in parentheses) for each branch are indicated.

Found at DOI: 10.1371/journal.pbio.0030357.sg009 (791 KB EPS).

**Table S1.** Dated Retrocopies

Found at DOI: 10.1371/journal.pbio.0030357.st001 (107 KB DOC).

## Accession Numbers

The GenBank (<http://www.ncbi.nlm.nih.gov/Genbank/>) accession numbers for the primate sequences generated for this paper are



DQ120612–DQ120720. They are detailed in Table S1. The Ensembl (<http://www.ensembl.org/>) accession numbers for other genes discussed in this paper are *GMCL1* (ENSG00000087338) and *PABP1* (ENSG00000152520).

## Acknowledgments

We thank Corinne Peter, Lukasz Potrzebowski, and Lia Rosso for technical help; Victor Jongeneel and the Vital-IT unit for computational support; Max Ingman for comments on the manuscript; and Christian Roos and F. M. Catzeflis for primate and treeshrew DNA

samples. This research was supported by funds available to HK from the Center for Integrative Genomics (University of Lausanne), the Swiss National Science Foundation (grant 3100A0–104181), and the European Union (grant PKB140404).

**Competing interests.** The authors have declared that no competing interests exist.

**Author contributions.** ACM, ID, NV, and HK conceived and designed the experiments. ACM and NV performed the experiments. ACM, ID, NV, and HK analyzed the data. ID and AR contributed reagents/materials/analysis tools. ACM, ID, NV, and HK wrote the paper. ■

## References

- Samonte RV, Eichler EE (2002) Segmental duplications and the evolution of the primate genome. *Nat Rev Genet* 3: 65–72.
- Brosius J (1991) Retroposons—Seeds of evolution. *Science* 251: 753.
- Long M, Betran E, Thornton K, Wang W (2003) The origin of new genes: Glimpses from the young and old. *Nat Rev Genet* 4: 865–875.
- Mighell AJ, Smith NR, Robinson PA, Markham AF (2000) Vertebrate pseudogenes. *FEBS Lett* 468: 109–114.
- Emerson JJ, Kaessmann H, Betran E, Long M (2004) Extensive gene traffic on the mammalian X chromosome. *Science* 303: 537–540.
- Betran E, Long M (2002) Expansion of genome coding regions by acquisition of new genes. *Genetica* 115: 65–80.
- Zhang Z, Harrison PM, Liu Y, Gerstein M (2003) Millions of years of evolution preserved: A comprehensive catalog of the processed pseudogenes in the human genome. *Genome Res* 13: 2541–2558.
- Ohshima K, Hattori M, Yada T, Gojobori T, Sakaki Y, et al. (2003) Whole-genome screening indicates a possible burst of formation of processed pseudogenes and Alu repeats by particular L1 subfamilies in ancestral primates. *Genome Biol* 4: R74.
- Zhang Z, Carriero N, Gerstein M (2004) Comparative analysis of processed pseudogenes in the mouse and human genomes. *Trends Genet* 20: 62–67.
- Esnault C, Maestre J, Heidmann T (2000) Human LINE retrotransposons generate processed pseudogenes. *Nat Genet* 24: 363–367.
- Betran E, Wang W, Jin L, Long M (2002) Evolution of the phosphoglycerate mutase processed gene in human and chimpanzee revealing the origin of a new primate gene. *Mol Biol Evol* 19: 654–663.
- Burki F, Kaessmann H (2004) Birth and adaptive evolution of a hominoid gene that supports high neurotransmitter flux. *Nat Genet* 36: 1061–1063.
- Wang PJ, Page DC (2002) Functional substitution for TAF(II)250 by a retroposed homolog that is expressed in human spermatogenesis. *Hum Mol Genet* 11: 2341–2346.
- Bradley J, Baltus A, Skaletsky H, Royce-Tolland M, Dewar K, et al. (2004) An X-to-autosome retrogene is required for spermatogenesis in mice. *Nat Genet* 36: 872–876.
- Yi S, Ellsworth DL, Li WH (2002) Slow molecular clocks in Old World monkeys, apes, and humans. *Mol Biol Evol* 19: 2191–2198.
- Liu G, Zhao S, Bailey JA, Sahinalp SC, Alkan C, et al. (2003) Analysis of primate genomic variation reveals a repeat-driven expansion of the human genome. *Genome Res* 13: 358–368.
- Locke DP, Jiang Z, Pertz LM, Misceo D, Archidiacono N, et al. (2005) Molecular evolution of the human chromosome 15 pericentromeric region. *Cytogenet Genome Res* 108: 73–82.
- Goodman M (1999) The genomic record of humankind's evolutionary roots. *Am J Hum Genet* 64: 31–39.
- Li WH (1997) Molecular evolution. Sunderland MA: Sinauer Associates. 487 p.
- Feral C, Guellaen G, Pawlak A (2001) Human testis expresses a specific poly(A)-binding protein. *Nucleic Acids Res* 29: 1872–1883.
- Wiedmann B, Sakai H, Davis TA, Wiedmann M (1994) A protein complex required for signal-sequence-specific sorting and translocation. *Nature* 370: 434–440.
- Soulard M, Della Valle V, Siomi MC, Pinol-Roma S, Codogno P, et al. (1993) hnRNP C: Sequence and characterization of a glycosylated RNA-binding protein. *Nucleic Acids Res* 21: 4210–4217.
- Mazumdar M, Sundareshan S, Misteli T (2004) Human chromokinesin KIF4A functions in chromosome condensation and segregation. *J Cell Biol* 166: 613–620.
- Zhu C, Jiang W (2005) Cell cycle-dependent translocation of PRC1 on the spindle by Kif4 is essential for midzone formation and cytokinesis. *Proc Natl Acad Sci U S A* 102: 343–348.
- Zhu C, Zhao J, Bibikova M, Levenson JD, Bossy-Wetzel E, et al. (2005) Functional analysis of human microtubule-based motor proteins, the kinesins and dyneins, in mitosis/cytokinesis using RNA interference (RNAi). *Mol Biol Cell* 16: 3187–3199.
- Leatherman JL, Levin L, Boero J, Jongens TA (2002) *germ cell-less* acts to repress transcription during the establishment of the *Drosophila* germ cell lineage. *Curr Biol* 12: 1681–1685.
- Masuhara M, Nagao K, Nishikawa M, Kimura T, Nakano T (2003) Enhanced degradation of MDM2 by a nuclear envelope component, mouse germ cell-less. *Biochem Biophys Res Commun* 308: 927–932.
- Ehrmann IE, Ellis PS, Mazeyrat S, Duthie S, Brockdorff N, et al. (1998) Characterization of genes encoding translation initiation factor eIF-2gamma in mouse and human: Sex chromosome localization, escape from X-inactivation and evolution. *Hum Mol Genet* 7: 1725–1737.
- Richler C, Soreq H, Wahrman J (1992) X inactivation in mammalian testis is correlated with inactive X-specific transcription. *Nat Genet* 2: 192–195.
- McCarrey JR, Thomas K (1987) Human testis-specific PGK gene lacks introns and possesses characteristics of a processed gene. *Nature* 326: 501–505.
- Jongens TA, Hay B, Jan LY, Jan YN (1992) The germ cell-less gene product: A posteriorly localized component necessary for germ cell development in *Drosophila*. *Cell* 70: 569–584.
- Jongens TA, Ackerman LD, Swedlow JR, Jan LY, Jan YN (1994) Germ cell-less encodes a cell type-specific nuclear pore-associated protein and functions early in the germ-cell specification pathway of *Drosophila*. *Genes Dev* 8: 2123–2136.
- Leatherman JL, Kaestner KH, Jongens TA (2000) Identification of a mouse germ cell-less homologue with conserved activity in *Drosophila*. *Mech Dev* 92: 145–153.
- Paulding CA, Ruvolo M, Haber DA (2003) The Tre2 (USP6) oncogene is a hominoid-specific gene. *Proc Natl Acad Sci U S A* 100: 2507–2511.
- Johnson ME, Viggiano L, Bailey JA, Abdul-Rauf M, Goodwin G, et al. (2001) Positive selection of a gene family during the emergence of humans and African apes. *Nature* 413: 514–519.
- Ciccarelli FD, von Mering C, Suyama M, Harrington ED, Izaurralde E, et al. (2005) Complex genomic rearrangements lead to novel primate gene function. *Genome Res* 15: 343–351.
- Zhang J, Rosenberg HF, Nei M (1998) Positive Darwinian selection after gene duplication in primate ribonuclease genes. *Proc Natl Acad Sci U S A* 95: 3708–3713.
- Cooper DN (1999) Human gene evolution. Oxford: BIOS Scientific Publishers. 490 p.
- Podlaha O, Zhang J (2004) Nonneutral evolution of the transcribed pseudogene Makorin1-p1 in mice. *Mol Biol Evol* 21: 2202–2209.
- Hirotsune S, Yoshida N, Chen A, Garrett L, Sugiyama F, et al. (2003) An expressed pseudogene regulates the messenger-RNA stability of its homologous coding gene. *Nature* 423: 91–96.
- Kleene KC (2001) A possible meiotic function of the peculiar patterns of gene expression in mammalian spermatogenic cells. *Mech Dev* 106: 3–23.
- Schmidt EE, Schibler U (1995) High accumulation of components of the RNA polymerase II transcription machinery in rodent spermatids. *Development* 121: 2373–2383.
- Schmidt EE (1996) Transcriptional promiscuity in testes. *Curr Biol* 6: 768–769.
- She X, Horvath JE, Jiang Z, Liu G, Furey TS, et al. (2004) The structure and evolution of centromeric transition regions within the human genome. *Nature* 430: 857–864.
- Mudge JM, Jackson MS (2005) Evolutionary implications of pericentromeric gene expression in humans. *Cytogenet Genome Res* 108: 47–57.
- Wu CI, Xu EY (2003) Sexual antagonism and X inactivation—The SAXI hypothesis. *Trends Genet* 19: 243–247.
- Swanson WJ, Vacquier VD (2002) The rapid evolution of reproductive proteins. *Nat Rev Genet* 3: 137–144.
- Nielsen R, Bustamante C, Clark AG, Gnanowski S, Sackton TB, et al. (2005) A scan for positively selected genes in the genomes of humans and chimpanzees. *PLoS Biol* 3: e170. DOI: 10.1371/journal.pbio.0030170
- Waterston RH, Lindblad-Toh K, Birney E, Rogers J, Abril JF, et al. (2002) Initial sequencing and comparative analysis of the mouse genome. *Nature* 420: 520–562.
- Torgerson DG, Singh RS (2004) Rapid evolution through gene duplication and subfunctionalization of the testes-specific alpha4 proteasome subunits in *Drosophila*. *Genetics* 168: 1421–1432.
- Lynch M, Force A (2000) The probability of duplicate gene preservation by subfunctionalization. *Genetics* 154: 459–473.
- Ohno S (1970) Evolution by gene duplication. Berlin: Springer-Verlag. 160 p.
- Hubbard T, Barker D, Birney E, Cameron G, Chen Y, et al. (2002) The Ensembl genome database project. *Nucleic Acids Res* 30: 38–41.
- Altschul SF, Madden TL, Schaffer AA, Zhang J, Zhang Z, et al. (1997) Gapped BLAST and PSI-BLAST: A new generation of protein database search programs. *Nucleic Acids Res* 25: 3389–3402.
- Lander ES, Linton LM, Birren B, Nussbaum C, Zody MC, et al. (2001) Initial sequencing and analysis of the human genome. *Nature* 409: 860–921.

56. Rice P, Longden I, Bleasby A (2000) EMBOSS: The European Molecular Biology Open Software Suite. *Trends Genet* 16: 276–277.
57. Yang Z (1997) PAML: A program package for phylogenetic analysis by maximum likelihood. *Comput Appl Biosci* 13: 555–556.
58. Chamary JV, Hurst LD (2005) Biased codon usage near intron-exon junctions: Selection on splicing enhancers, splice-site recognition or something else? *Trends Genet* 21: 256–259.
59. Bustamante CD, Nielsen R, Hartl DL (2002) A maximum likelihood method for analyzing pseudogene evolution: Implications for silent site evolution in humans and rodents. *Mol Biol Evol* 19: 110–117.
60. Kimura M (1980) A simple method for estimating evolutionary rates of base substitutions through comparative studies of nucleotide sequences. *J Mol Evol* 16: 111–120.
61. Zhang J, Webb DM (2003) Evolutionary deterioration of the vomeronasal pheromone transduction pathway in catarrhine primates. *Proc Natl Acad Sci U S A* 100: 8337–8341.
62. Yang Z (1998) Likelihood ratio tests for detecting positive selection and application to primate lysozyme evolution. *Mol Biol Evol* 15: 568–573.
63. Yang Z, Wong WS, Nielsen R (2005) Bayes empirical Bayes inference of amino acid sites under positive selection. *Mol Biol Evol* 22: 1107–1118.
